# Supplementary material for: Challenges In Reanalysis Products To Assess Extreme Weather Impacts On Yield Underestimate Drought
Source: Research Square preprint supplement (doi:10.21203/rs.3.rs-908090/v1), 2021-09-28
Supplement: Supplementary file 2 [file 8a32272ec40898a41b8146bf.docx]

**Supplementary Materials**


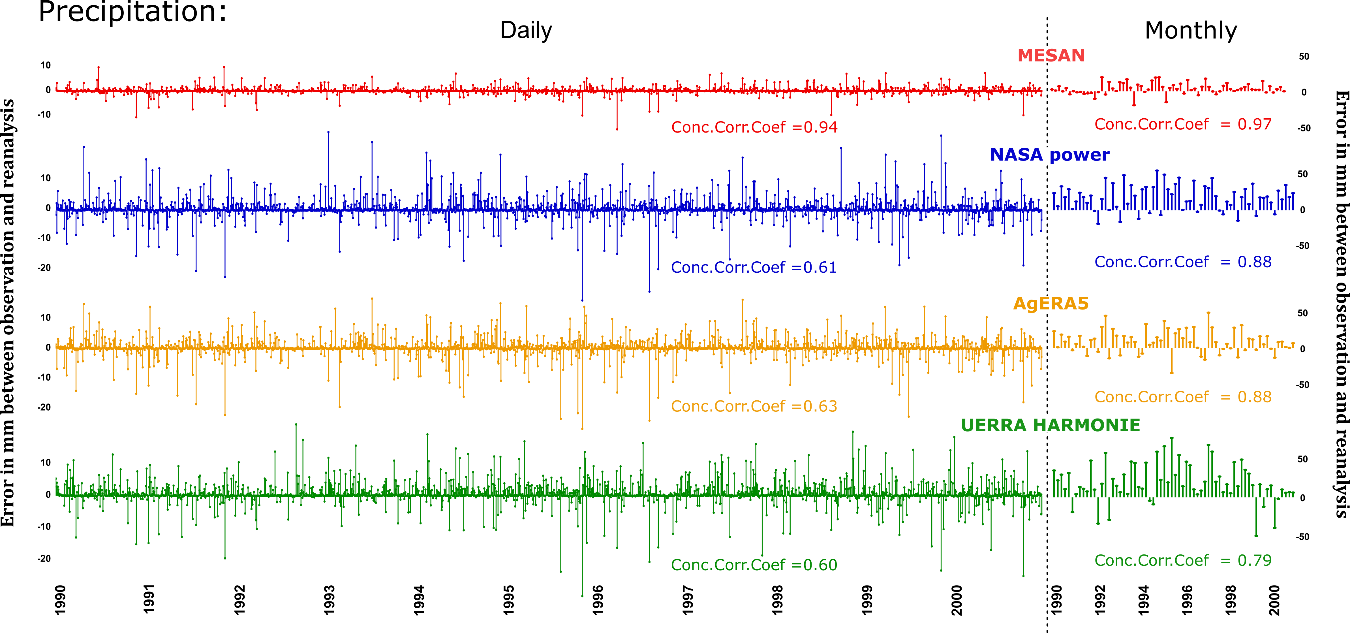


**Fig. S1**: Error between observed precipitation and reanalysis product values for each cropping season (April-September) 1990-2000 at Ultuna. Left: error based on daily data and right: error based on monthly data, with agreement given as concordance correlation coefficient (Conc.Corr.Coeff).


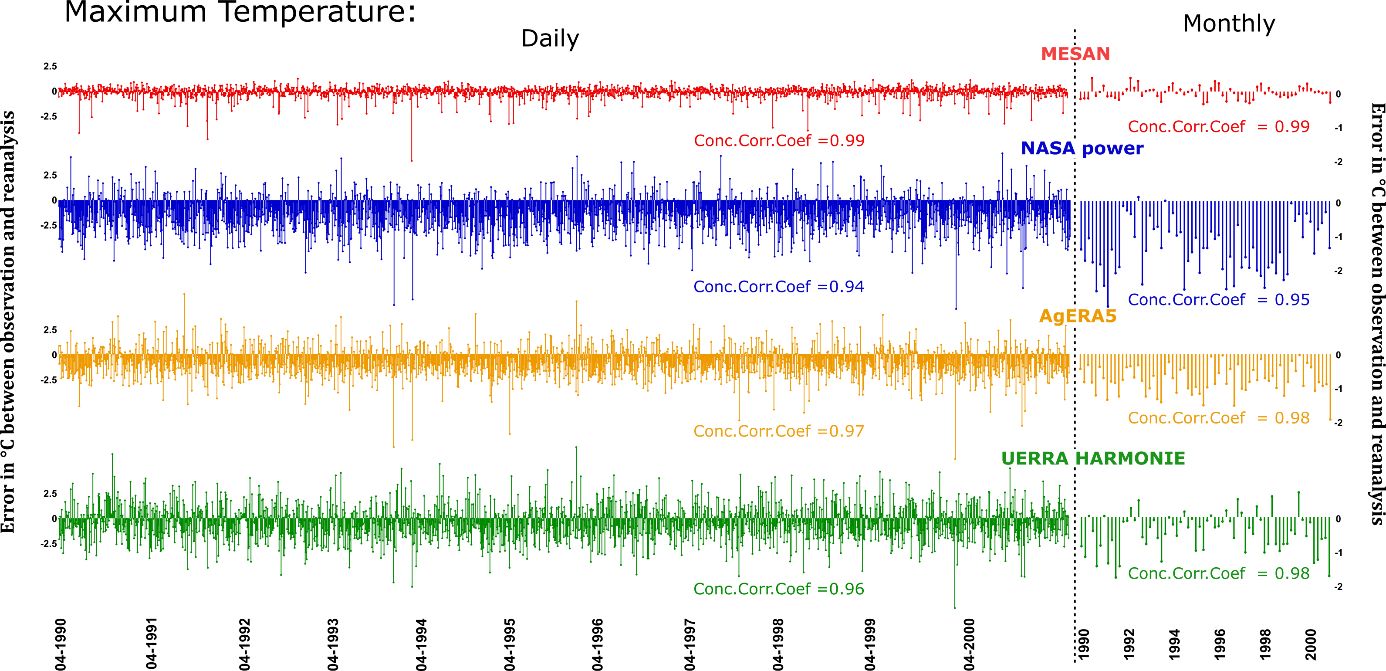


**Fig. S2**: Error between observed maximum temperature and reanalysis product values for each cropping season (April-September) 1990-2000 at Ultuna. Left: error based on daily data and right: error based on monthly data, with agreement given as concordance correlation coefficient (Conc.Corr.Coeff).


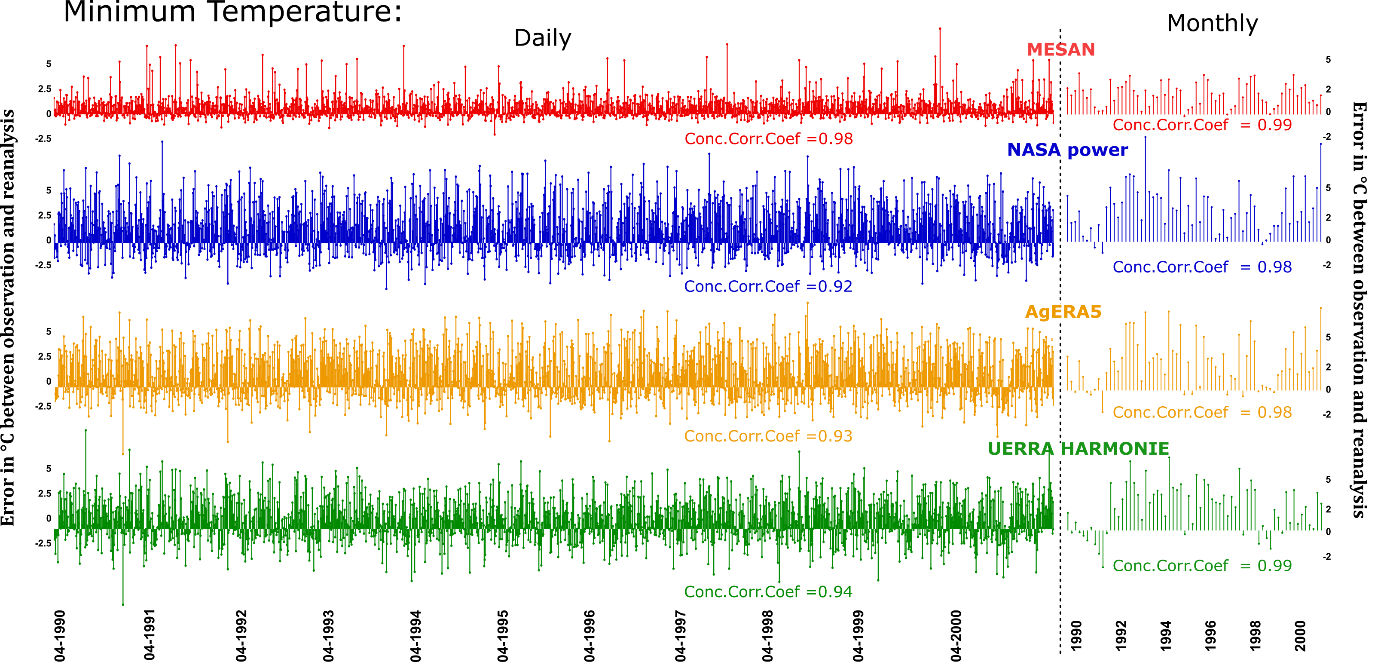


**Fig. S3**. Error between observed minimum temperature and reanalysis product values for each cropping season (April-September) 1990-2000 at Ultuna. Left: error based on daily data and right: error based on monthly data, with agreement given as concordance correlation coefficient (Conc.Corr.Coeff).
